# Supplementary material for: Gabbro Discovery in Discovery Deep: First Plutonic Rock Samples From the Red Sea Rift Axis
Source: Frontiers journal article supplement (doi:10.3389/feart.2021.742815), 2021-11-23
Supplement: Table_1.XLSX [file Table_1.XLSX]

## Sheet: Sheet1
Plagioclase	Monitoring standards
Element			SiO2	TiO2	Al2O3	FeO tot	Fe2O3	FeO	MnO	MgO	CaO	Na2O	K2O	Cr2O3	Sum
Ref. sample	115900	plag	51.25	0.05	30.91	0.46				0.14	13.64	3.45	0.18		100.17
measured average (n = 12)			50.79	0.04	31.14	0.41				0.13	13.6	3.47	0.12
2 SD (n = 12)			0.08	0.02	0.58	0.08				0.02	0.07	0.08	0.01
	137041	anorthite	44	0.03	36.03	0.67	0	0.67		< 0.02	19.09	0.53	0.03		100.38
measured average (n = 12)			42.92	0.01	35.55	0.45				0.03	19.19	0.52	0.01
2 SD (n = 12)			0.29	0.01	0.68	0.06				0.02	0.05	0.03	0.01
	134966	microcline	64.24	0.01	18.3	0.04	0	0.04	0.04	0.03	0.02	1.3	15.14		99.12
measured average (n = 6)			63.54	0	18.95	0.03				0	0.03	1.27	15.13
2 SD (n = 6)			0.53	0	0.33	0.02				0	0.01	0.03	0.2
	122142	kak. augite	50.73	0.74	8.73	6.37	1.08	5.37	0.13	16.65	15.82	1.27	0		100.56
measured average (n = 6)			49.29	0.75	8.44	6.38				16.28	16.08	1.25	0
2 SD (n = 6)			0.49	0.03	0.12	0.26				0.29	0.25	0.05	0
Spinel	Monitoring standards
Element			SiO2	TiO2	Al2O3	FeO tot	Fe2O3	FeO	MnO	MgO	CaO	Na2O	K2O	Cr2O3	Sum
Ref. sample	96189	ilmenite		45.7		46.54			4.77	0.31					99.4
measured average (n = 6)				44.92		47.23			4.66	0.2
2 SD (n = 6)				1.06		1.17			0.14	0.07
Ref. sample	117075	chromite			9.92			13.04	0.11	15.2				60.5	98.89
measured average (n = 6)					9.99			13.08	0.07	15.33				61.34
2 SD (n = 6)					0.05			0.21	0.02	0.12				0.89
Olivine	Monitoring Standards
Element			SiO2	TiO2	Al2O3	FeO tot	Fe2O3	FeO	MnO	MgO	CaO	Na2O	K2O	Cr2O3	Sum
Ref. sample	111312/44	SC olivine	40.81					9.55	0.14	49.42	< 0.05				100.29
measured average (n = 18)			40.97					9.52	0.14	49.75	0.1
2 SD (n = 18)			0.2					0.09	0.01	0.2	0
Clinoyroxene	Monitoring Standards
Element			SiO2	TiO2	Al2O3	FeO tot	Fe2O3	FeO	MnO	MgO	CaO	Na2O	K2O	Cr2O3	Sum
Ref. sample	122142	kak. augite	50.73	0.74	8.73	6.37	1.08	5.37	0.13	16.65	15.82	1.27	0		100.56
measured average (n = 12)			50.15	0.76	8.72	6.32			0.13	16.7	15.89	1.25	0
2 SD (n = 12)			0.39	0.03	0.14	0.29			0.05	0.12	0.09	0.04	0
Ref. sample	164905	cr. augite	50.48	0.51	8.03	4.66	1.04	3.77	0.12	17.32	17.3	0.84	< 0.01	0.85	100.26
measured average (n = 12)			50.27	0.44	7.8	4.68			0.13	17.81	17.18	0.79	0	0.78
2 SD (n = 12)			0.43	0.02	0.09	0.16			0.06	0.3	0.15	0.02	0.01	0.05
